# Supplementary material
Source: PubMed Central journal article supplement (PMC4550535)

Supplemental Information 1: Specificity loop length and KARI class of 3,422 unique KARIs retrieved from Pfam. Four additional Class I KARIs had other specificity loop lengths. Green indicates enzymes with representative structures published prior to this study.

| <b>Loop Length</b> | <b>6</b> | <b>7</b> | <b>12</b> |
|--------------------|----------|----------|-----------|
| <b>Class I</b>     | 595      | 2260     | 5         |
| <b>Class II</b>    | 0        | 20       | 538       |

Supplemental Information 2: Refinement Statistics for structures presented in this paper.  
 Values in parentheses represent statistics from the highest-resolution shell.

|                                              | Aa_KARI_holo<br>4TSK        | Ua_KARI_holo<br>4XDY                     | Ia_KARI_holo<br>4XDZ       | Ia_KARI_apo<br>4XEH                      | Av_KARI_met<br>4XIY        |
|----------------------------------------------|-----------------------------|------------------------------------------|----------------------------|------------------------------------------|----------------------------|
| <b>Data Collection</b>                       |                             |                                          |                            |                                          |                            |
| <b>Space Group</b>                           | <i>P</i> 2 3                | <i>P</i> 2 <sub>1</sub> 2 <sub>1</sub> 2 | <i>P</i> 2 <sub>1</sub>    | <i>P</i> 2 <sub>1</sub> 2 <sub>1</sub> 2 | <i>P</i> 2 <sub>1</sub> 3  |
| <b>Cell Dimensions</b>                       |                             |                                          |                            |                                          |                            |
| <i>a,b,c</i> (Å)                             | 124.10, 124.10,<br>124.10   | 141.75, 148.60,<br>49.70                 | 54.58, 90.75,<br>69.53     | 67.48, 112.35,<br>46.07                  | 185.05, 185.05,<br>185.05  |
| <i>α,β,γ</i> (°)                             | 90, 90, 90                  | 90, 90, 90                               | 90, 100.3, 90              | 90, 90, 90                               | 90, 90, 90                 |
| <b>Resolution</b> (Å)                        | 124.10-2.50 (2.57-<br>2.50) | 102.57-1.54 (1.58-<br>1.54)              | 68.42-1.15 (1.21-<br>1.15) | 57.85-1.39 (1.43-<br>1.39)               | 82.76-2.50 (2.64-<br>2.50) |
| <i>R<sub>p.i.m</sub></i> (%)                 | 5.3 (61.8)                  | 4.4 (49.8)                               | 5.4 (64.3)                 | 2.2 (107.9)                              | 5.7 (31.3)                 |
| <i>Mn(I)/sd</i>                              | 8.9 (0.8)                   | 11.1 (1.5)                               | 6.9 (0.9)                  | 13.6 (0.6)                               | 10.9 (2.6)                 |
| <b>Completeness</b> (%)                      | 97.7 (89.1)                 | 97.3 (71.8)                              | 95.0 (82.4)                | 96.8 (76.0)                              | 99.5 (99.9)                |
| <b>Redundancy</b>                            | 3.4 (2.9)                   | 4.5 (4.5)                                | 3.0 (2.5)                  | 3.6 (3.9)                                | 3.5 (3.6)                  |
| <b>Refinement</b>                            |                             |                                          |                            |                                          |                            |
| <b>No. reflections</b>                       | 22,066                      | 145,320                                  | 224,341                    | 65,375                                   | 72,509                     |
| <i>R<sub>work</sub>/R<sub>free</sub></i> (%) | 15.6/18.2<br>(21.2/27.2)    | 17.9/20.9<br>(39.1/38.4)                 | 15.8/19.0<br>(33.2/34.1)   | 18.0/23.5<br>(38.2/38.0)                 | 19.4/24.4<br>(28.7/32.1)   |
| <b>No. atoms</b>                             |                             |                                          |                            |                                          |                            |
| <b>Protein</b>                               | 2,585                       | 5,296                                    | 5,139                      | 2,561                                    | 10,017                     |
| <b>Ligand/ion</b>                            | 61                          | 126                                      | 178                        | 0                                        | 48                         |
| <b>Water</b>                                 | 46                          | 359                                      | 595                        | 101                                      | 40                         |
| <b>RMSD</b>                                  |                             |                                          |                            |                                          |                            |
| <b>Bond lengths</b> (Å)                      | 0.018                       | 0.023                                    | 0.024                      | 0.019                                    | 0.015                      |
| <b>Bond angles</b> (°)                       | 1.998                       | 2.038                                    | 2.461                      | 1.930                                    | 1.719                      |
| <b>Ramachandran map<br/>analysis</b>         |                             |                                          |                            |                                          |                            |
| <b>Favored</b>                               | 313                         | 653                                      | 589                        | 309                                      | 1,194                      |
| <b>Allowed</b>                               | 17                          | 20                                       | 29                         | 13                                       | 99                         |
| <b>Outliers</b>                              | 1                           | 0                                        | 0                          | 0                                        | 23                         |

Supplemental Information 3: Sequence alignment of crystallized KARIs. Helices are colored in magenta, and  $\beta$ -strands in cyan. Yellow indicates special features, labeled with the following abbreviations: motif = diphosphate binding motif; specific. = specificity loop; m = metal-binding residue; n = nicotinamide amide-binding residue; h = hinge point (when unambiguously definable). Metal-binding and nicotinamide amide-binding residues are shown only for one active site in the Class I proteins. The knotted domain of the Class I KARIs has been duplicated for clarity; duplicate residues are shown with grey text.



Supplemental Information 4: Electron density around the substrate of Ia\_KARI\_holo indicates dehydroxylation of IpoHA. Left: final structure, modelled with *N*-isopropoxyloxamate (ligand 40E). Right: modelled instead with *N*-hydroxy-*N*-isopropoxyloxamate (IpoHA; ligand H10). The  $F_o-F_c$  map (red and green) clearly shows the absence of the *N*-hydroxy moiety. ( $2F_o-F_c$  map contoured to  $1.5\sigma$ ,  $F_o-F_c$  map contoured to  $4.0\sigma$ ).

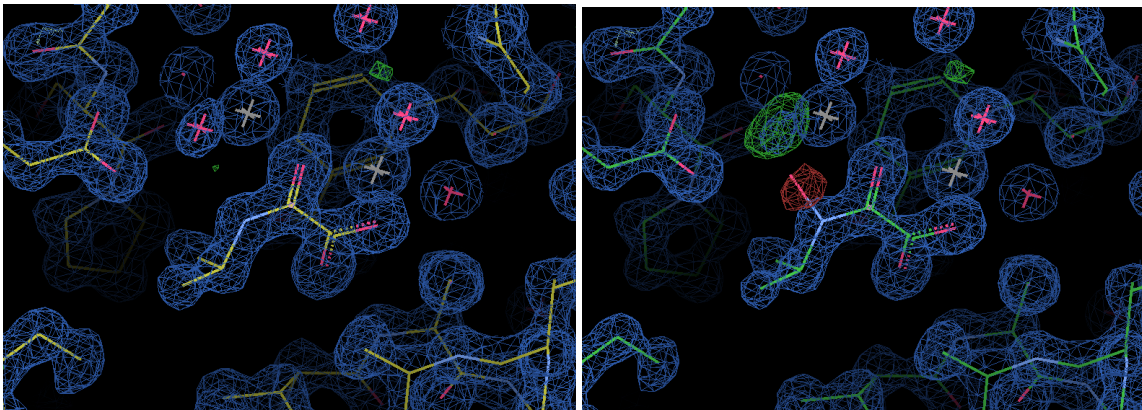

Supplemental Information 5: Structural rearrangements around NADPH nicotinamide in Ia\_KARI. Binding of the nicotinamide of NADPH (magenta) to the  $\alpha$ A-helix and the  $\beta$ 6 $\alpha$ F-loop recruits the  $\alpha$ 3-helix of the other chain of the dimer (cyan).

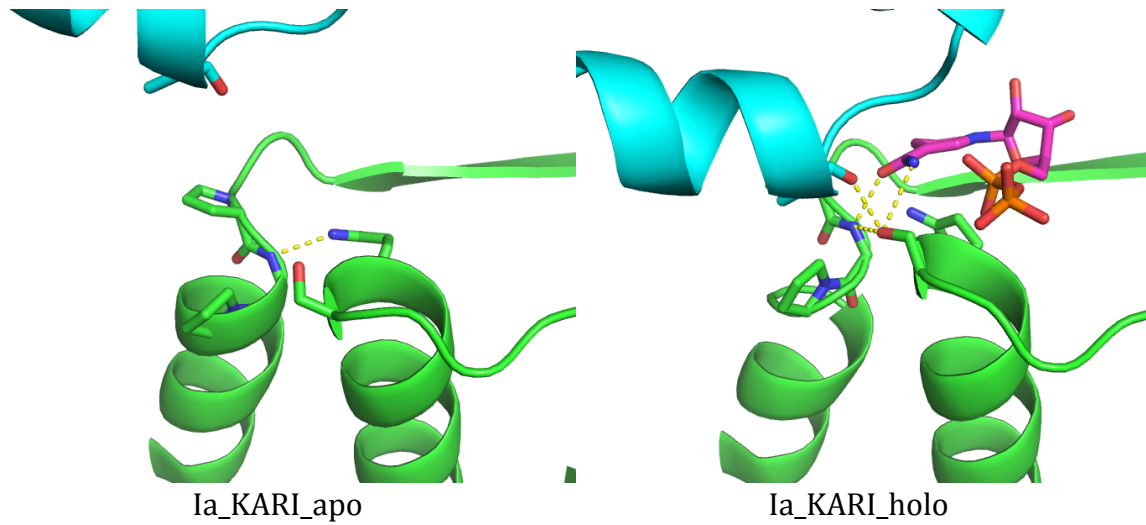

Supplemental Information 6: % Identity between mesophilic Class I KARIs as determined by Clustal Omega.

| %ID between Av_KARI and: |       |
|--------------------------|-------|
| Ia_KARI                  | 46.9% |
| Pa_KARI                  | 93.2% |
| Se_KARI                  | 55.9% |

Supplemental Information 7: Amino acid identities and numberings in mesophilic Class I KARIs

| <b>Position in Pa_KARI</b> | <b>Position in Av_KARI</b> | <b>Position in Se_KARI</b> |
|----------------------------|----------------------------|----------------------------|
| H107                       | H107                       | H118                       |
| K130                       | K130                       | K141                       |
| D190                       | D190                       | S201                       |
| E194                       | E194                       | E205                       |
| E226                       | E226                       | E237                       |
| E230                       | E230                       | E241                       |
| S249                       | S249                       | S260                       |
| H134                       | H134                       | H145                       |
| S26                        | S26                        | S37                        |
| P132                       | P132                       | P143                       |
| G133                       | G133                       | G144                       |
| A131                       | A131                       | G142                       |



Supplemental Information 8: Structural rearrangements around NADPH nicotinamide in Av\_KARI/Se\_KARI. As with Ia\_KARI, binding of the nicotinamide of NADPH (magenta) to the the  $\alpha$ A-helix and the  $\beta$ 6 $\alpha$ F-loop recruits the  $\alpha$ 3-helix of the other chain of the dimer (cyan); in these KARIs more hydrogen bonds are present and undergo rearrangements of the hydrogen bond network.

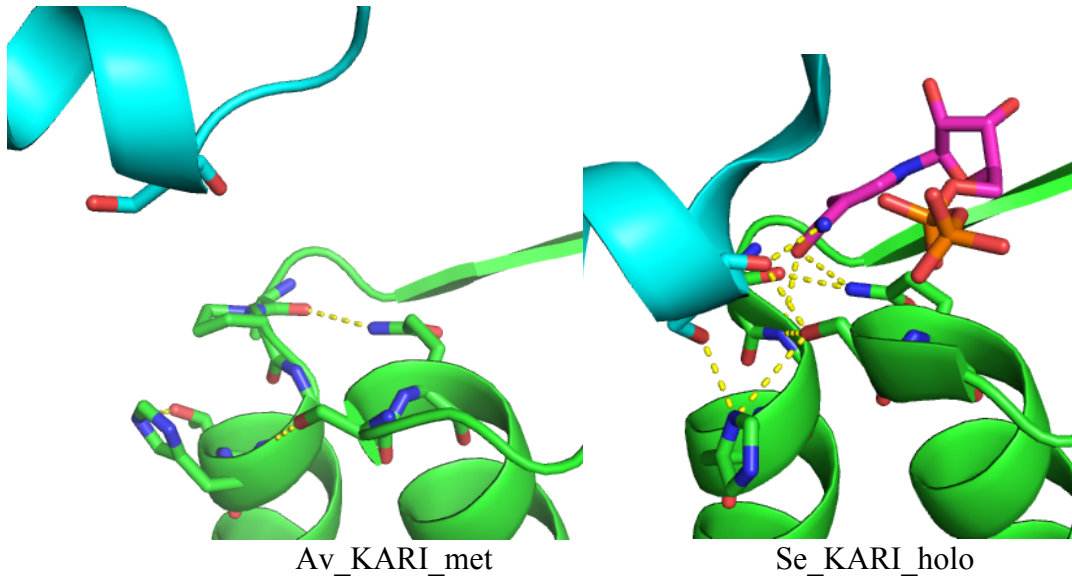

Supplemental Information 9: Modelling error at P132-G133 in Pa\_KARI\_apo. The  $F_o - F_c$  omit map (red and green) shows differential density around the peptide bond in the published structure (yellow) that is resolved by implementing a  $180^\circ$  peptide flip (white). This alteration is corroborated by improved backbone hydrogen bond interactions. ( $2F_o - F_c$  map contoured to  $1.5\sigma$ ,  $F_o - F_c$  map contoured to  $2.9\sigma$ ).

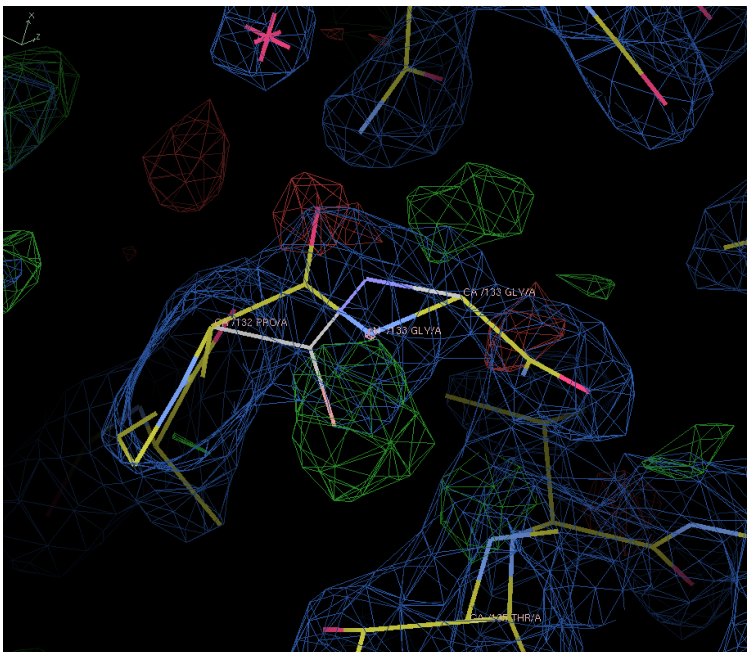

Supplemental Information 10: Structural rearrangements around NADPH nicotinamide in Ec\_KARI

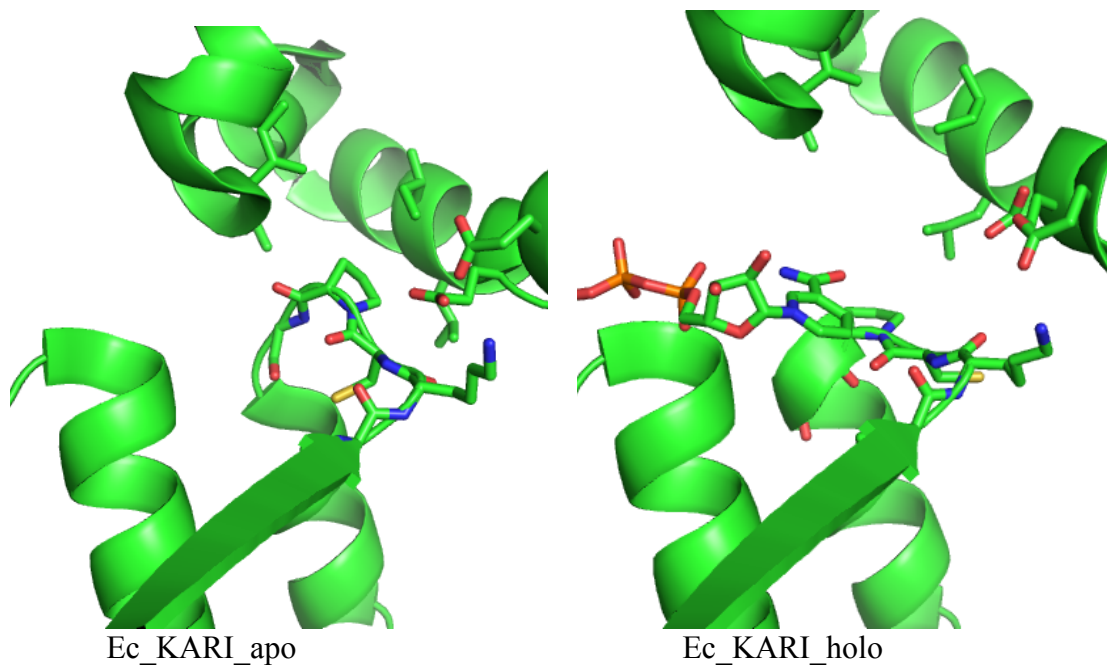

Supplement: NIHMS690011-supplement-Supplmental_Info.pdf [file NIHMS690011-supplement-Supplmental_Info.pdf]
